# Supplementary material for: Baicalin Mitigates the Neuroinflammation through the TLR4/MyD88/NF‐κB and MAPK Pathways in LPS‐Stimulated BV‐2 Microglia
Source: Hindawi journal article supplement (doi:10.1155/2022/3263446), 2022-01-01
Supplement: f1 [file 3263446.f1.pdf]

## Supplementary Material

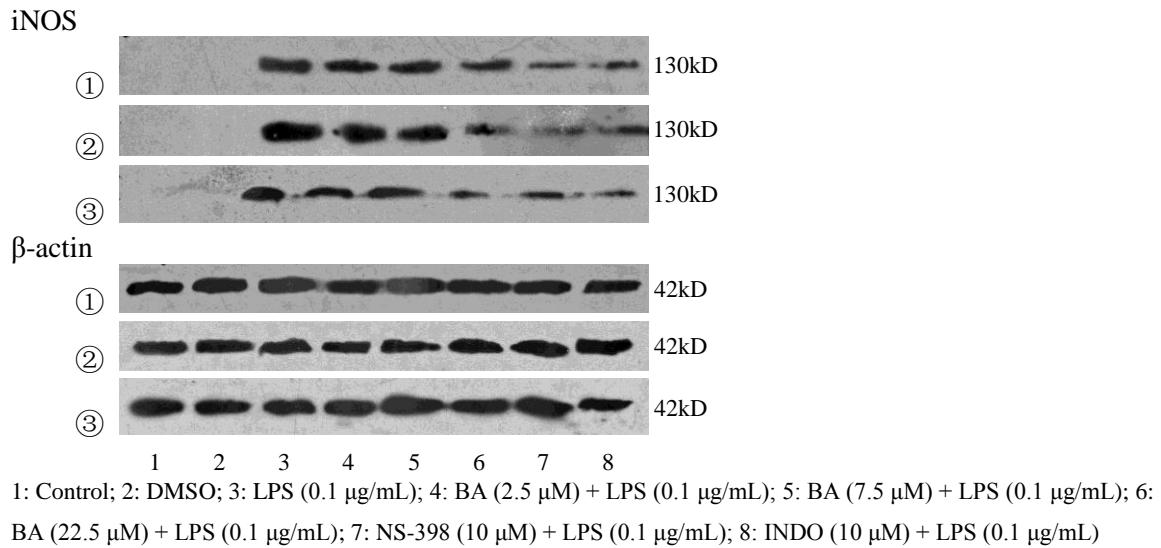

**Figure S1** Original WB bands of iNOS/β-actin

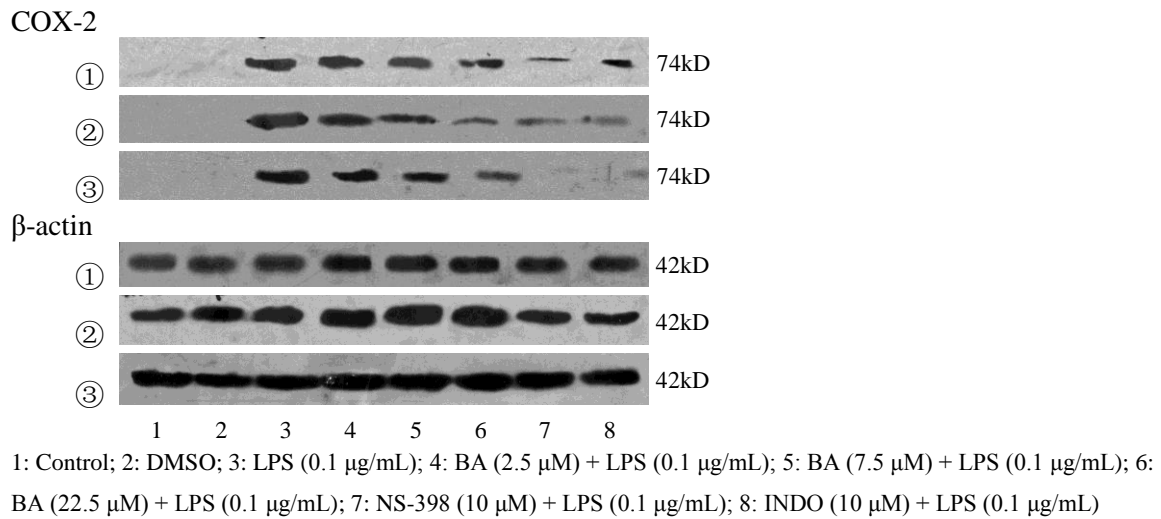

**Figure S2** Original WB bands of COX-2/β-actin

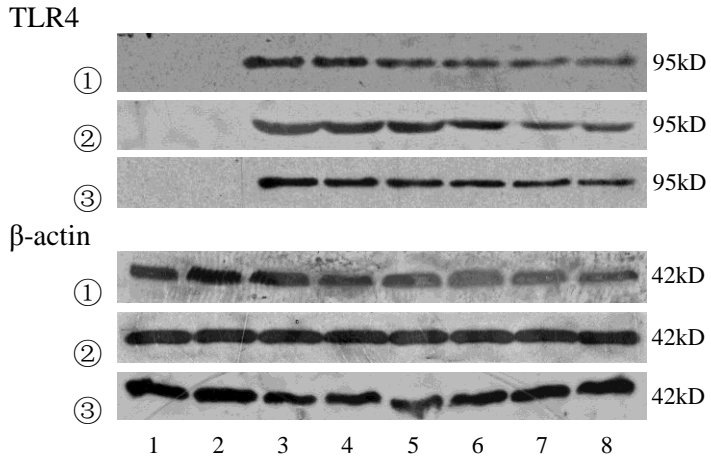

1: Control; 2: DMSO; 3: LPS (0.1 µg/mL); 4: BA (2.5 µM) + LPS (0.1 µg/mL); 5: BA (7.5 µM) + LPS (0.1 µg/mL); 6: BA (22.5 µM) + LPS (0.1 µg/mL); 7: MTS510 (1 µg/mL) + LPS (0.1 µg/mL); 8: INDO (10 µM) + LPS (0.1 µg/mL)

**Figure S3** Original WB bands of TLR4/β-actin

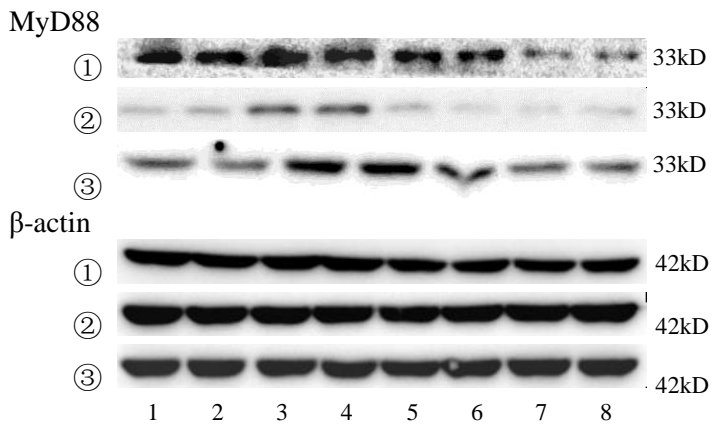

1: Control; 2: DMSO; 3: LPS (0.1 µg/mL); 4: BA (2.5 µM) + LPS (0.1 µg/mL); 5: BA (7.5 µM) + LPS (0.1 µg/mL); 6: BA (22.5 µM) + LPS (0.1 µg/mL); 7: ST2825 (0.1 µg/mL) + LPS (0.1 µg/mL); 8: INDO (10 µM) + LPS (0.1 µg/mL)

**Figure S4** Original WB bands of MyD88/β-actin

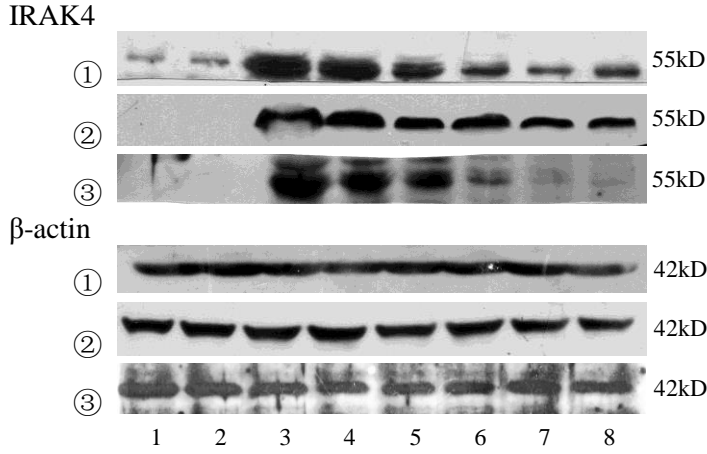

1: Control; 2: DMSO; 3: LPS (0.1 μg/mL); 4: BA (2.5 μM) + LPS (0.1 μg/mL); 5: BA (7.5 μM) + LPS (0.1 μg/mL); 6: BA (22.5 μM) + LPS (0.1 μg/mL); 7: IRAK-1/4 Inhibitor (0.1 μg/mL) + LPS (0.1 μg/mL); 8: INDO (10 μM) + LPS (0.1 μg/mL)

**Figure S5** Original WB bands of IRAK4/β-actin

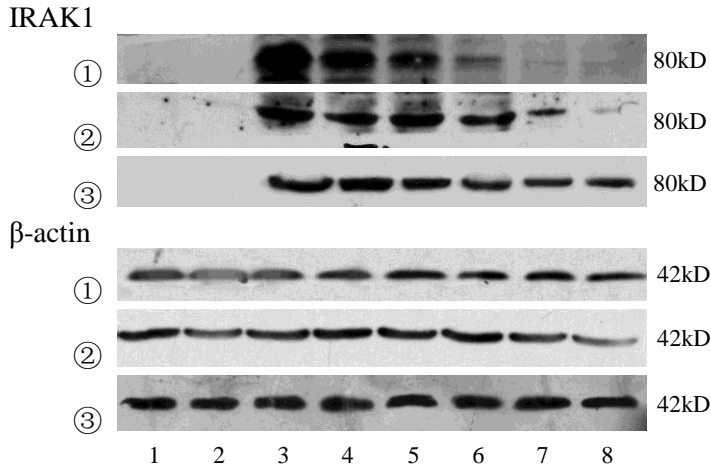

1: Control; 2: DMSO; 3: LPS (0.1 μg/mL); 4: BA (2.5 μM) + LPS (0.1 μg/mL); 5: BA (7.5 μM) + LPS (0.1 μg/mL); 6: BA (22.5 μM) + LPS (0.1 μg/mL); 7: IRAK-1/4 Inhibitor (0.1 μg/mL) + LPS (0.1 μg/mL); 8: INDO (10 μM) + LPS (0.1 μg/mL)

**Figure S6** Original WB bands of IRAK1/β-actin

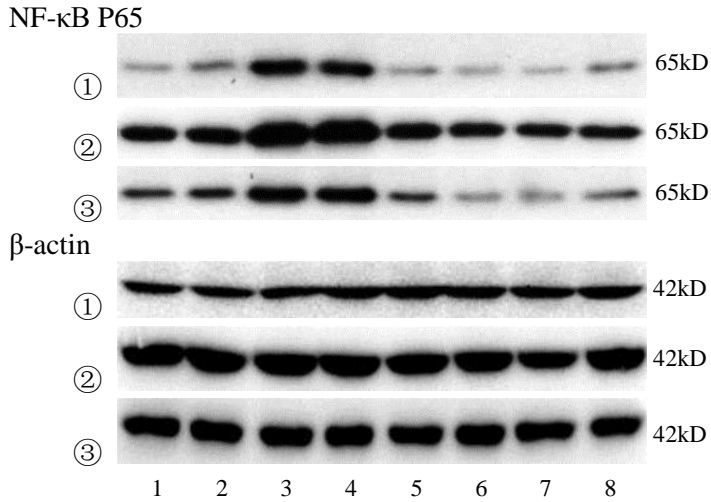

1: Control; 2: DMSO; 3: LPS (0.1  $\mu$ g/mL); 4: BA (2.5  $\mu$ M) + LPS (0.1  $\mu$ g/mL); 5: BA (7.5  $\mu$ M) + LPS (0.1  $\mu$ g/mL); 6: BA (22.5  $\mu$ M) + LPS (0.1  $\mu$ g/mL); 7: PDTC (10  $\mu$ M) + LPS (0.1  $\mu$ g/mL); 8: INDO (10  $\mu$ M) + LPS (0.1  $\mu$ g/mL)

**Figure S7** Original WB bands of NF- $\kappa$ B P65/ $\beta$ -actin

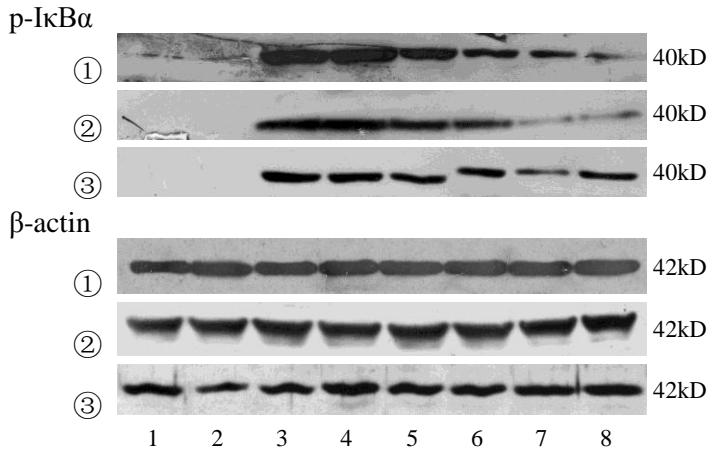

1: Control; 2: DMSO; 3: LPS (0.1  $\mu$ g/mL); 4: BA (2.5  $\mu$ M) + LPS (0.1  $\mu$ g/mL); 5: BA (7.5  $\mu$ M) + LPS (0.1  $\mu$ g/mL); 6: BA (22.5  $\mu$ M) + LPS (0.1  $\mu$ g/mL); 7: PDTC (10  $\mu$ M) + LPS (0.1  $\mu$ g/mL); 8: INDO (10  $\mu$ M) + LPS (0.1  $\mu$ g/mL)

**Figure S8** Original WB bands of p-I $\kappa$ B $\alpha$ / $\beta$ -actin

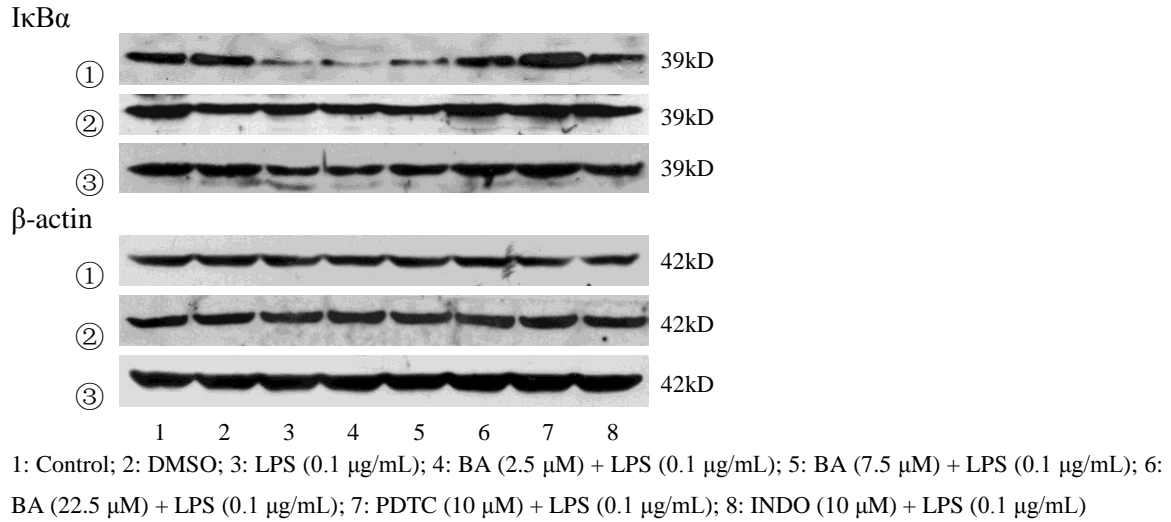

**Figure S9** Original WB bands of IκBα/β-actin

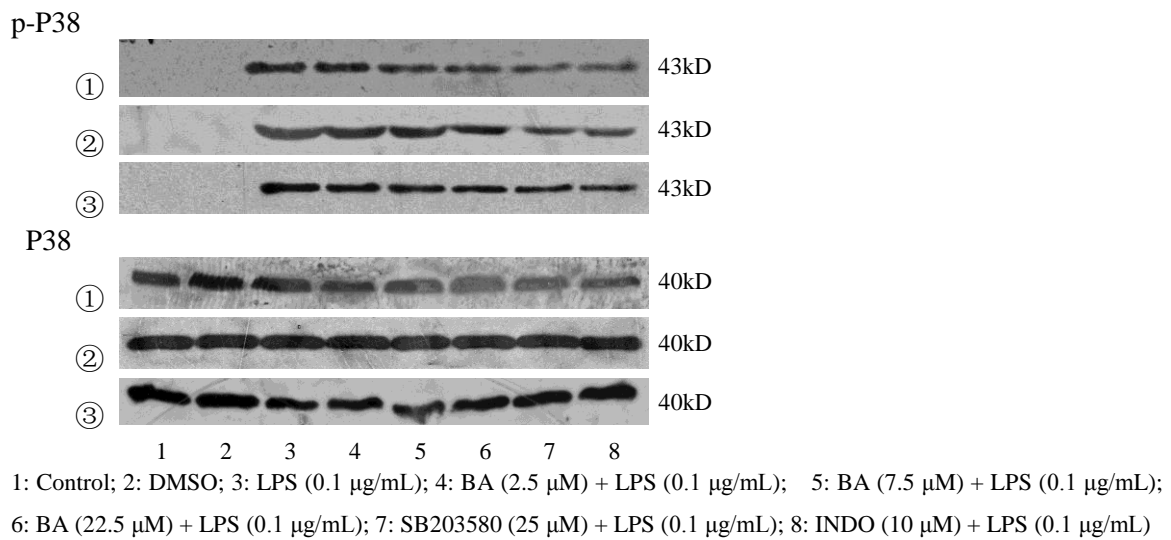

**Figure S10** Original WB bands of p-P38/P38

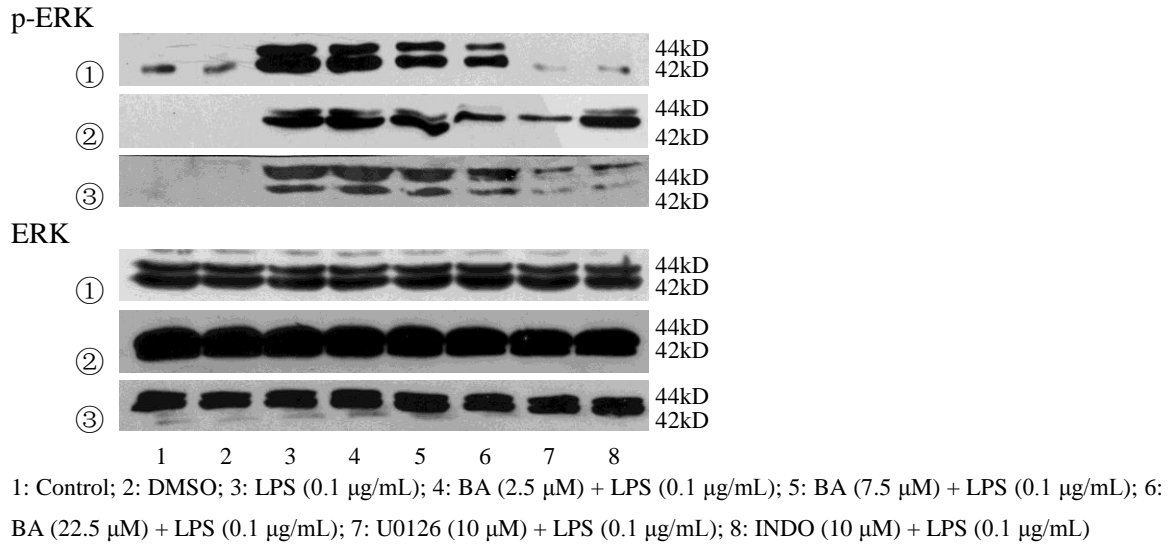

**Figure S11** Original WB bands of p-ERK/ERK

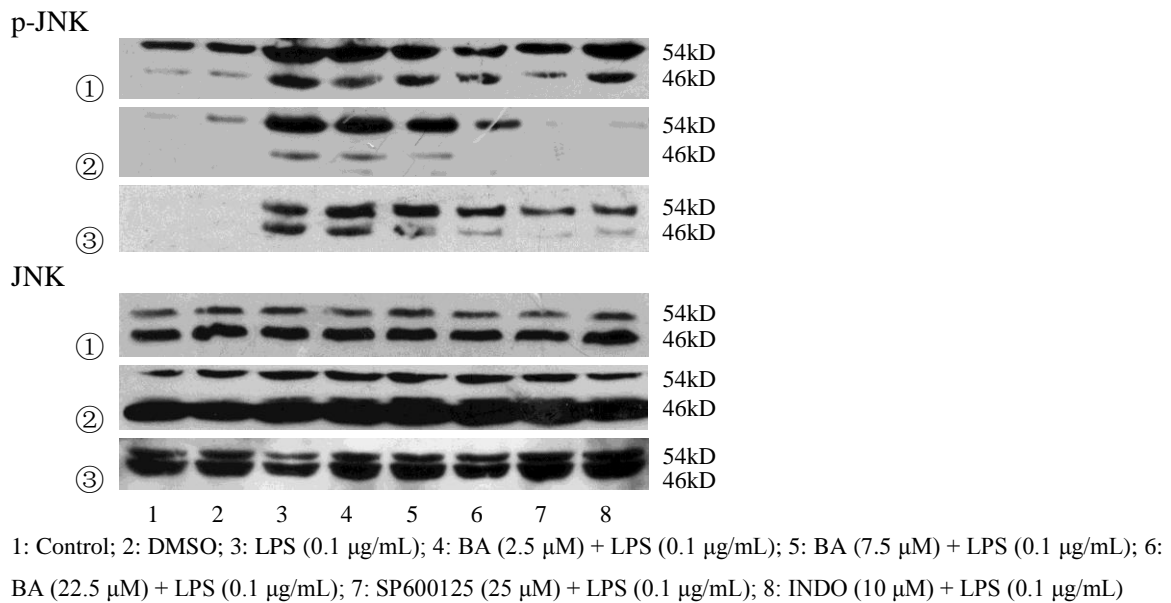

**Figure S12** Original WB bands of p-JNK/JNK
